# Supplementary material for: Thiolated Hydroxypropyl-β-cyclodextrin: A Potential Multifunctional Excipient for Ocular Drug Delivery
Source: MDPI journal article supplement (doi:10.3390/ijms23052612), 2022-02-26
Supplement: s1 [file s1]

## Supplementary material

**Table S1:** Synthesis conditions in which HP- $\beta$ -CD or thiourea is dissolved in acetic acid or in hydrochloric acid.

| Reagents |          |          |           |           | Reaction Condition  |       |       |       | OUTPUT |                |
|----------|----------|----------|-----------|-----------|---------------------|-------|-------|-------|--------|----------------|
| HPBCD    | AcOH     | Thiourea | HCl       | AcOH      | Vessel              | t     | time  | Power | Yield  | Thiolation     |
| mg/mL    | Molarity | (mg/ml)  | Molarity2 | Molarity4 | open(O), closed (C) | (°C)  | (min) | (W)   | %      | ( $\mu$ mol/g) |
| 100      | 1.74     | 133.7    | 0.4       |           | O                   | 87-80 | 55    | 30    | 24.5   | 100-150        |
| 100      | 0.174    | 133.7    | 0.4       |           | O                   | 85-80 | 55    | 30    | 7.4    | 80-60          |
| 100      | 8.7      | 107      | 0.3       | 3.5       | O                   | 80-75 | 55    | 24    | 5.2    | 50             |
| 100      | 8.7      | 107      | 0.3       | 3.5       | O                   | 75    | 60    | 24    | 2.3    | 90             |
| 100      | 3.48     | 133.7    | 0.4       |           | O                   | 87-77 | 55    | 30    | 10.8   | 80-100         |
| 100      | 1.74     | 133.7    | 0.4       |           | O                   | 85-80 | 55    | 30    | 5.6    | 160            |
| 100      | 8.7      | 107      | 0.3       | 3.5       | O                   | 75    | 60    | 30    | 4.3    | 115-130        |
| 100      | 0.87     | 107      | 0.4       |           | O                   | 85-80 | 60    | 30    | 10.4   | 90-100         |
| 100      | 0.174    | 107      | 0.4       |           | O                   | 85-80 | 60    | 30    | 14     | 90-100         |
| 100      | 1.74     | 133.7    | 0.4       |           | C                   | 85-80 | 55    | 30    | 14.3   | 100-120        |
| 100      | 0.87     | 107      | 0.4       |           | O                   | 80    | 60    | 30    | 9.7    | 80-90          |
| 100      | 8.7      | 133.7    | 1.0       | 4.3       | C                   | 80    | 60    | 30    | 9.8    | 130-150        |
| 100      | 8.7      | 133.7    | 1.0       | 4.3       | C                   | 80-75 | 55    | 30    | 3.1    | 250-260        |
| 100      | 8.7      | 133.7    | 1.0       |           | C                   | 80    | 45    | 30    | 11.9   | 100-130        |
| 100      | 8.7      | 133.7    | 1.0       | 4.3       | C                   | 80    | 60    | 40    | -      | -              |
| 100      | 0.087    | 133.7    | 1.0       | 4.3       | C                   | 80    | 60    | 40    | 6      | 30-50          |
| *100     | 0.174    | 200      | 0.4       |           | O                   | 90    | 45    | 40    | 7.5    | 120-145        |
| 100      | 0.174    | 133.7    | 0.4       |           | O                   | 90    | 45    | 40    | 11.7   | 100-120        |
| 100      | 8.7      | 133.7    | 0.4       |           | C                   | 90    | 45    | 40    | 38     | 90-115         |
| 100      | 0.174    | 133.7    | 1.0       | 4.3       | C                   | 90    | 45    | 40    | 2.8    | 600            |
| 100      | 0.174    | 133.7    | 0.4       | 0         | C                   | 90    | 45    | 40    | 7.1    | 200-250        |
| 100      | 0.174    | 133.7    | 0.4       | 0         | C                   | 90    | 45    | 40    | 5.9    | 250-260        |

**Table S2:** Synthesis conditions in which HP- $\beta$ -CD or thiourea is dissolved in DMF or in water.

| Reagents |       |     |          |          |       |       |           |           | Reaction Condition  |      |       |       | OUTPUT |            |
|----------|-------|-----|----------|----------|-------|-------|-----------|-----------|---------------------|------|-------|-------|--------|------------|
| HPBCD    | water | DMF | AcOH     | Thiourea | water | DMF   | HCl       | AcOH      | Vessel              | t    | time  | Power | Yield  | Thiolation |
| mg/mL    | (ml)  | ml  | Molarity | (mg/ml)  | (mL)2 | (mL)3 | Molarity2 | Molarità4 | open(O), closed (C) | (°C) | (min) | (W)   | %      | (umol/g)   |
| 100      |       | 1   |          | 150      |       | 3,5   | 1,5       |           | C                   | 85   | 45    | 30    | 13%    | 0          |
| 100      |       | 0,5 | 8,7      | 133,7    |       | 2,65  | 1,0       | 4,3       | C                   | 80   | 45    | 30    | 0      | -          |
| 100      | 1     |     |          | 133,7    | 2,45  |       | 0,1       | 6,5       | C                   | 80   | 45    | 40    | 0      | -          |
| 100      | 1     |     |          | 133,7    | 2,5   |       |           | 6,5       | C                   | 80   | 45    | 40    | 3,4    | circa 20   |
| 100      | 1     |     |          | 133,7    | 3,5   |       |           | 2,2       | C                   | 80   | 45    | 40    | 14,5   | circa 10   |
| 100      | 1     |     |          | 133,7    | 3,5   |       |           | 2,2       | C                   | 90   | 45    | 40    | 11     | 20-30      |
| 100      | 1     |     |          | 133,7    | 2,5   |       |           | 6,5       | C                   | 90   | 45    | 40    | 26,1   | 50-90      |
| 100      | 1     |     |          | 133,7    | 1,5   |       |           | 10,9      | C                   | 90   | 45    | 40    | 36,9   | 40-60      |
| 100      | 1     |     |          | 133,7    | 2,45  |       | 0,1       | 6,5       | C                   | 90   | 45    | 40    | 4,7    | -          |
| 100      | 1     |     |          | 133,7    | 2,3   |       | 0,6       | 6,5       | C                   | 90   | 45    | 40    | 0,5    | -          |
| 100      | 1     |     |          | 133,7    | 2,15  |       | 1,0       | 6,5       | C                   | 90   | 45    | 40    | 0      | -          |
| 100      |       |     | 0,2      | 200      |       | 40    |           |           | O                   | 90   | 45    | 40    | 237,2  | 10_20      |
| 100      |       |     | 0,2      | 133,7    |       | 40    |           |           | O                   | 90   | 45    | 40    | 250    | 10_20      |
| 100      |       | 1   | 1,4      | 150      |       | 3,7   | 0,9       |           | C                   | 90   | 45    | 40    | 27     | 50-60      |
| 100      |       | 1   | 1,4      | 133,7    |       | 3,7   | 0,9       |           | C                   | 90   | 45    | 40    | 41,1   | 55-60      |
| 100      |       | 1   |          | 150      |       | 3,7   | 0,9       |           | C                   | 90   | 45    | 40    | 46,1   | 60-80      |
| 100      |       | 1   |          | 133,7    |       | 3,7   | 0,9       |           | C                   | 90   | 45    | 40    | 37,3   | 40-50      |
| 100      |       |     | 0,2      | 133,7    |       | 3,6   | 0,4       |           | C                   | 90   | 45    | 40    | 70,1   | -          |
| 100      |       |     | 0,2      | 150      |       | 4     |           |           | C                   | 90   | 45    | 40    | 52,5   | -          |
| 100      |       |     | 0,2      | 133,7    |       | 3,6   | 0,4       |           | C                   | 90   | 60    | 40    | 54     | -          |
| 100      |       |     | 0,2      | 150      |       | 4     |           |           | C                   | 90   | 60    | 40    | 51,4   | 20-50      |

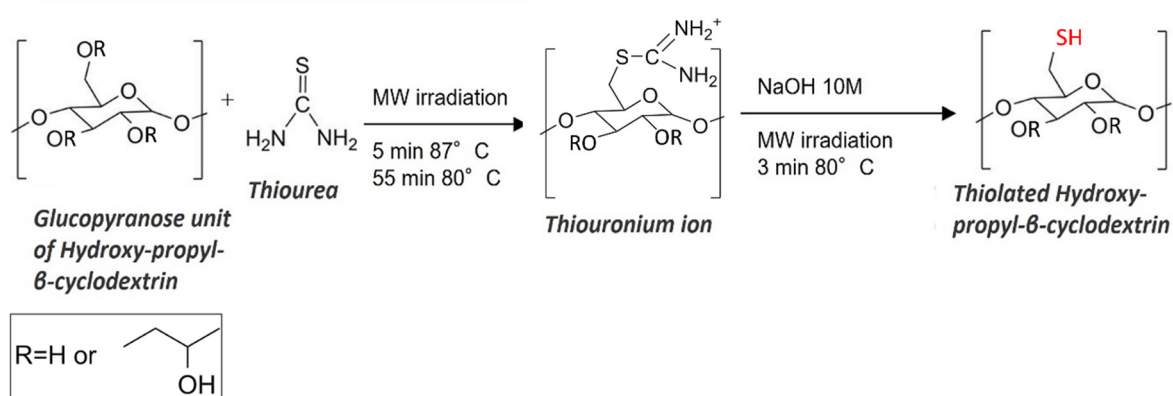

**Figure S1** Schematic representation of MW-assisted thiolation. In the first step a solution of thiourea was added dropwise to a solution of HP- $\beta$ -CD in acidic condition under constant stirring. The obtained solution was irradiated for 5 minutes at 87 °C and 55 minutes at 80 °C. The reaction mixture was then hydrolysed under irradiation for 3 minutes at 80 °C into the thiolated compound.

Figure S1

The scheme should have higher resolution. Moreover, the 'OR' notations are missed at C3 and C6. It should be as in the latter structures.

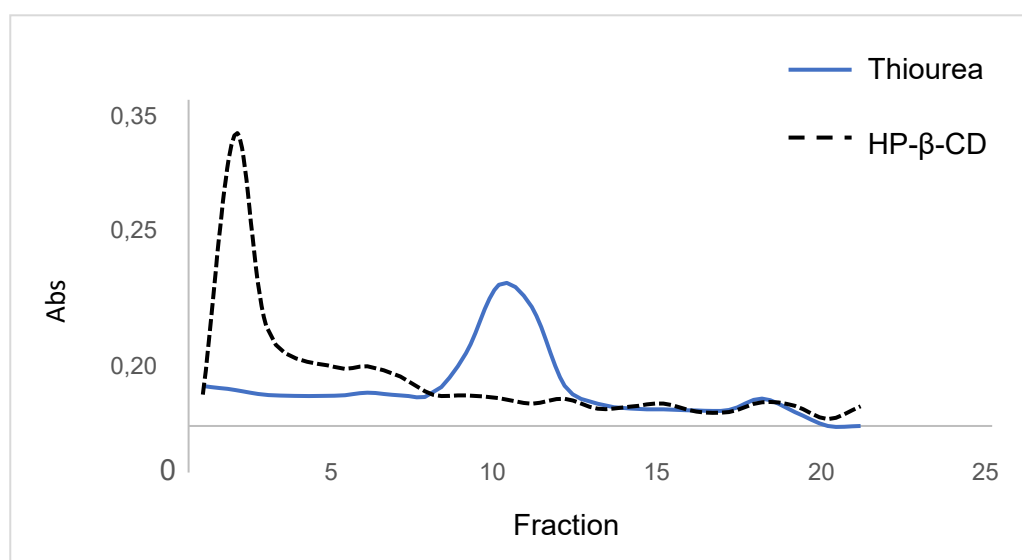

**Figure S2.** Column elution of thiourea and HP $\beta$ CD-SH

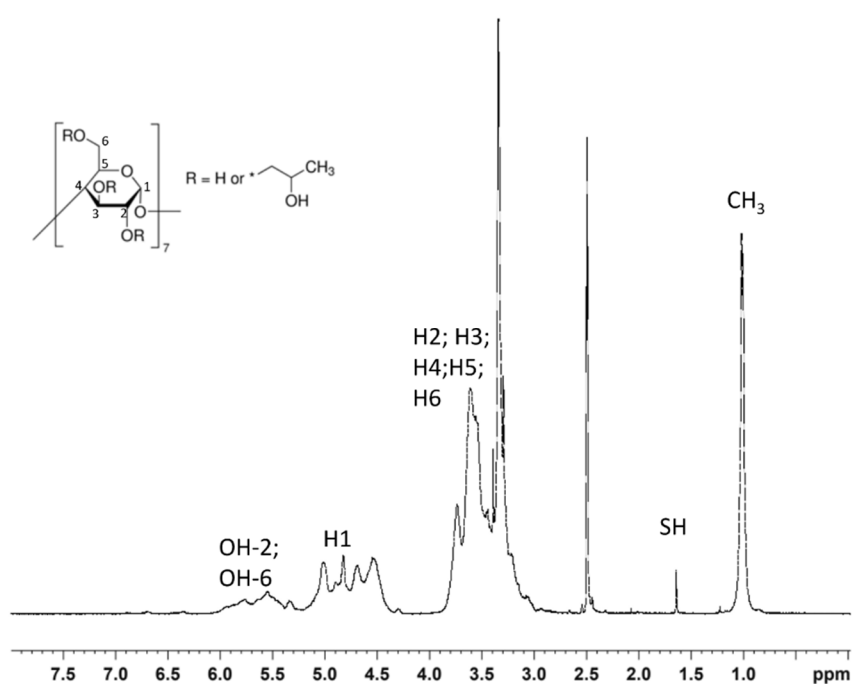

**Figure S3.** <sup>1</sup>H NMR (600 MHz, DMSO-d<sub>6</sub>, 25 °C, 5 mg/mL) spectra of HP-β-CD-SH. δ = 5.4-6.1 ppm (hydroxyl protons in C2 and C6), 5.6-4.9 ppm (anomeric proton), 2.8-3.9 ppm (protons of the pyranosidic ring), 1.65 ppm (proton of the thiol group), 1 ppm (methylene protons of the hydroxypropyl moiety).

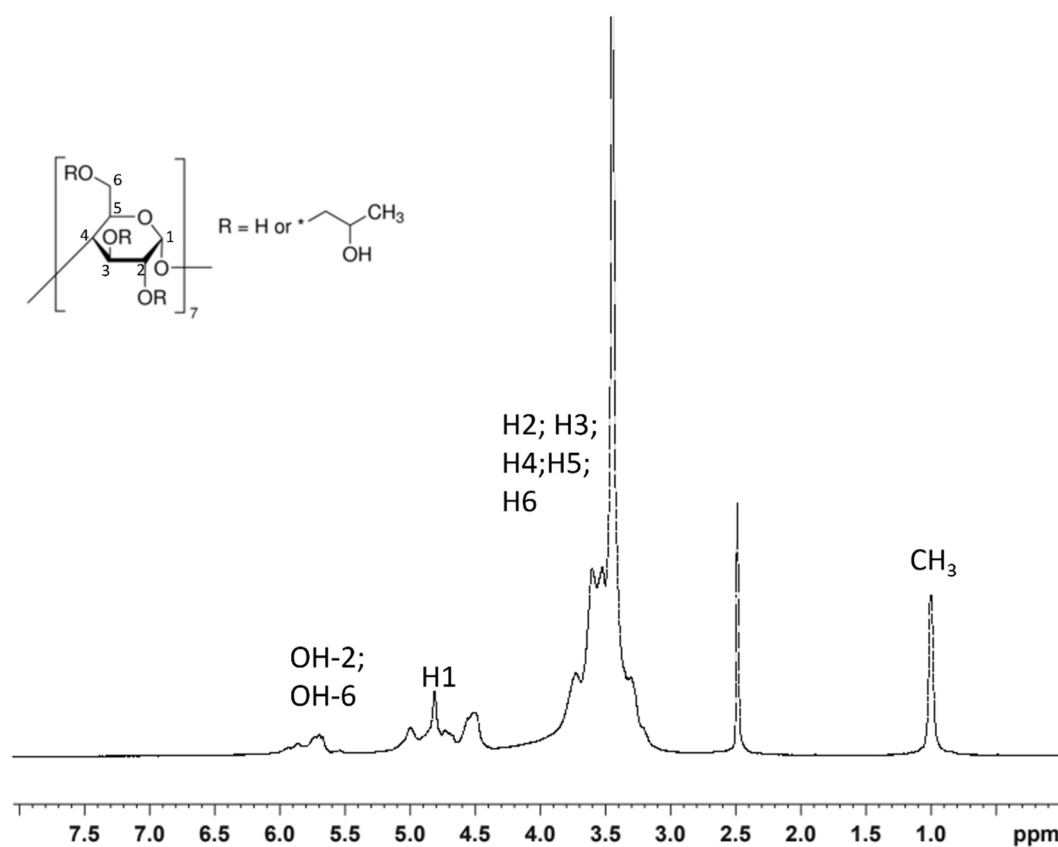

**Figure S4.**  $^1\text{H}$  NMR (600 MHz, DMSO- $d_6$ , 25 °C, 5 mg/mL) spectra of HP- $\beta$ -CD.  $\delta$  = 5.4-6.1ppm (hydroxyl protons in C2 and C6), 5.6-4.9 ppm (anomeric proton), 2.8-3.9 ppm (protons of the pyranosidic ring), 1ppm (methylene protons of the hydroxypropyl moiety).

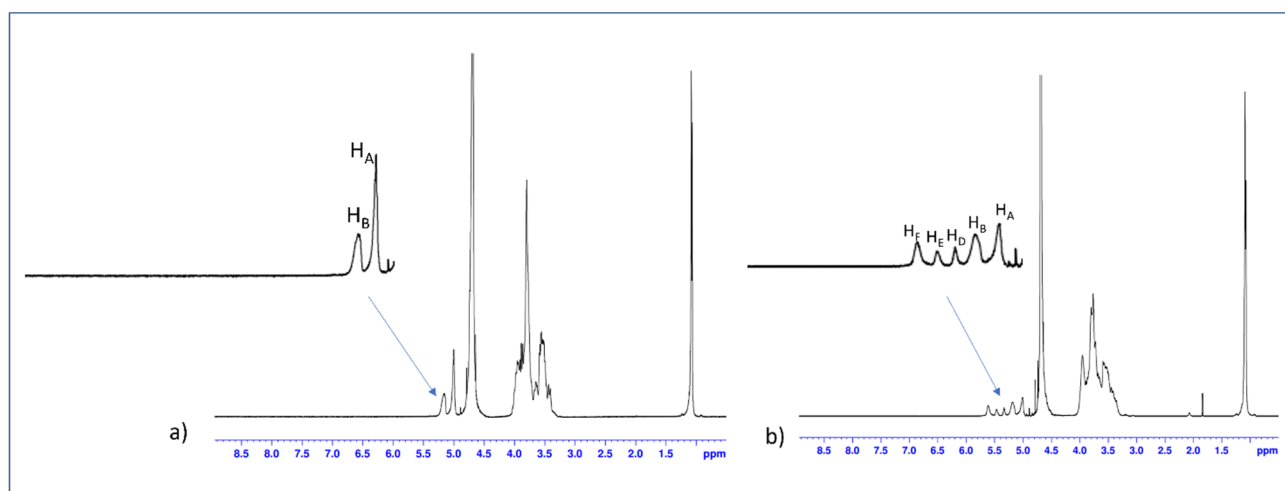

**Figure S5.**  $^1\text{H}$  NMR (600 MHz,  $\text{D}_2\text{O}$ , 25  $^\circ\text{C}$ , 5 mg/mL) spectra of **(a)** HP- $\beta$ -CD  $\delta = 5.03\text{ppm}$ ,  $5.169\text{ppm}$  (anomeric protons of the hydroxypropyl and native  $\beta$ -CD),  $2.8\text{--}3.9\text{ ppm}$  (protons of the pyranosidic ring),  $1\text{ppm}$  (methylene protons of the hydroxypropyl moiety). **(b)** HP- $\beta$ -CD-SH  $\delta = 5.03\text{ppm}$ ,  $5.169\text{ppm}$  (anomeric protons of the hydroxypropyl and native  $\beta$ -CD),  $5.34\text{ppm}$ ,  $5.45\text{ppm}$ ,  $5.61\text{ppm}$   $2.8\text{--}3.9\text{ ppm}$  (anomeric protons of thiolated cyclodextrin, with or without the hydroxypropyl functionality, substituted in C6 or C2),  $2.8\text{--}4.1\text{ ppm}$  (protons of the pyranosidic ring),  $1.65\text{ppm}$  (proton of the thiol group),  $1\text{ppm}$  (methylene protons of the hydroxypropyl moiety).
